# Supplementary material for: In situ insertion of shutter ions in MnO2 to boost the supercapacitive performance of flexible supercapacitors
Source: Royal Society of Chemistry journal article supplement (doi:10.1039/d3ta02819d), 2023-01-01
Supplement: d3ta02819d1.pdf [file d3ta02819d1.pdf]

## ***Supplementary Information***

### **In-situ inserting shutter ions in MnO<sub>2</sub> to boost supercapacitive performance of flexible supercapacitor**

Haoyu Wei, Tongchuan Sun, Mingyue Liu, Qingyang Pang, Yuting Qian, Xinwen Dou, Yuwei

Zhang, Qiang Ju\* and Zhenlan Fang\*

School of Flexible Electronics (Future Technologies) & Institute of Advanced Materials (IAM), Key Laboratory of Flexible Electronics (KLOFE), Jiangsu National Synergetic Innovation Center for Advanced Materials (SICAM), Nanjing Tech University (NanjingTech), Nanjing 211816 (China). Email: [iamqju@njtech.edu.cn](mailto:iamqju@njtech.edu.cn); [iamzlfang@njtech.edu.cn](mailto:iamzlfang@njtech.edu.cn)

## Table of Contents

|                                                                                                                                                                          |    |
|--------------------------------------------------------------------------------------------------------------------------------------------------------------------------|----|
| 1.0 The components of $\delta\text{-(M}^+_y\text{Mn}^{3+}_y\text{Mn}^{4+}_{1-y})\text{O}^{2-}_2\text{@ACC}$ .....                                                        | 3  |
| 2.0 Electrochemical performance of $\delta\text{-(Na}^+_y\text{Mn}^{3+}_y\text{Mn}^{4+}_{1-y})\text{O}^{2-}_2\text{@ACC}$ .....                                          | 4  |
| 3.0 PXRD patterns of $\delta\text{-(Na}^{+0.48}\text{Mn}^{3+0.48}\text{Mn}^{4+0.52})\text{O}^{2-}_2\text{@ACC}$ .....                                                    | 6  |
| 4.0 Na 1s XPS spectra of the selected samples .....                                                                                                                      | 7  |
| 5.0 Electrochemical performance of $\delta\text{-(Li}^+_y\text{Mn}^{3+}_y\text{Mn}^{4+}_{1-y})\text{O}^{2-}_2\text{@ACC}$ .....                                          | 8  |
| 6.0 PXRD pattern of $\text{Fe}_2\text{O}_3\text{@ACC}$ .....                                                                                                             | 10 |
| 7.0 Electrochemical performance of $\text{Fe}_2\text{O}_3\text{@ACC}$ .....                                                                                              | 11 |
| 8.0 Electrochemical performance of $\delta\text{-(M}^+_y\text{Mn}^{3+}_y\text{Mn}^{4+}_{1-y})\text{O}^{2-}_2\text{@ACC}$ ( $\text{M}^+=\text{Rb}^+, \text{Cs}^+$ ) ..... | 13 |
| 9.0 Supplementary References .....                                                                                                                                       | 15 |

## 1.0 The components of $\delta\text{-(M}^+_y\text{Mn}^{3+}_y\text{Mn}^{4+}_{1-y})\text{O}^{2-}_2\text{@ACC}$

**Tab. 1** The components of  $\delta\text{-(M}^+_y\text{Mn}^{3+}_y\text{Mn}^{4+}_{1-y})\text{O}^{2-}_2\text{@ACC}$ .

| Sample Names                                                                           | $y^a$ | $y^b$ |
|----------------------------------------------------------------------------------------|-------|-------|
| $\delta\text{-(Li}^+_y\text{Mn}^{3+}_y\text{Mn}^{4+}_{1-y})\text{O}^{2-}_2\text{@ACC}$ | 0.41  | 0.40  |
| $\delta\text{-(Na}^+_y\text{Mn}^{3+}_y\text{Mn}^{4+}_{1-y})\text{O}^{2-}_2\text{@ACC}$ | 0.49  | 0.48  |
| $\delta\text{-(K}^+_y\text{Mn}^{3+}_y\text{Mn}^{4+}_{1-y})\text{O}^{2-}_2\text{@ACC}$  | 0.54  | 0.55  |

<sup>a</sup>The  $y$  values determined by XPS analysis (Mn  $2p_{3/2}$  spectra).<sup>1</sup>

<sup>b</sup>The  $y$  values determined by XPS analysis (O  $1s$  spectra).

## 2.0 Electrochemical performance of $\delta-(\text{Na}^+_y\text{Mn}^{3+}_y\text{Mn}^{4+}_{1-y})\text{O}^{2-}_2@\text{ACC}$

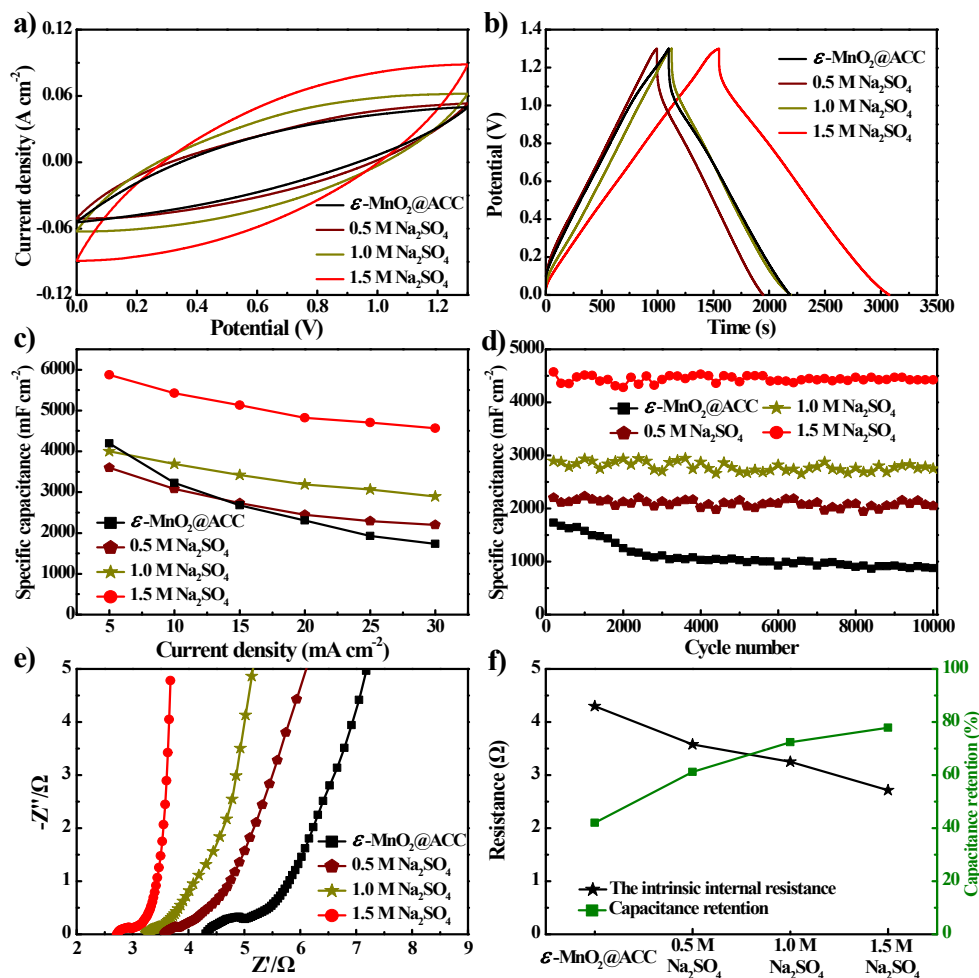

**Supplementary Fig. 1** Electrochemical performances of a series of  $\delta-(\text{Na}^+_y\text{Mn}^{3+}_y\text{Mn}^{4+}_{1-y})\text{O}^{2-}_2@\text{ACC}$ , in which  $\text{Na}^+$  was inserted by CV sweep at  $\text{Na}_2\text{SO}_4$  electrolyte with varied concentration of 0.5 M, 1.0 M, and 1.5 M, respectively, for 500 times: (a) CV curves at  $20 \text{ mV s}^{-1}$ , (b) GCD curves at  $5 \text{ mA cm}^{-2}$ , (c) the areal capacitances at various discharge current densities ranging from 5 to  $30 \text{ mA cm}^{-2}$ , (d) the plots of areal capacitance at  $30 \text{ mA cm}^{-2}$  over 10,000 charge/discharge cycles, (e) Nyquist plots, (f) the resistance and the capacitance retention upon increasing the discharge current density from 5 to  $30 \text{ mA cm}^{-2}$ . Note:  $\delta-(\text{Na}^+_y\text{Mn}^{3+}_y\text{Mn}^{4+}_{1-y})\text{O}^{2-}_2@\text{ACC}$  and  $\epsilon\text{-MnO}_2@\text{ACC}$  tested in 1.5 M  $\text{Na}_2\text{SO}_4$ .

To ascertain the optimal electrolyte concentration for fabricating  $\delta-(\text{Na}^+_y\text{Mn}^{3+}_y\text{Mn}^{4+}_{1-y})\text{O}^{2-}_2$  *in-situ* growing on activated carbon cloth (ACC) [ $\delta-(\text{Na}^+_y\text{Mn}^{3+}_y\text{Mn}^{4+}_{1-y})\text{O}^{2-}_2@\text{ACC}$ ] electrode by electrochemical method, the electrochemical performances of a series of  $\delta-(\text{Na}^+_y\text{Mn}^{3+}_y\text{Mn}^{4+}_{1-y})\text{O}^{2-}_2@\text{ACC}$  electrodes, in which  $\text{Na}^+$  ions were inserted by CV sweep in 0.5 M  $\text{Na}_2\text{SO}_4$ , 1.0 M  $\text{Na}_2\text{SO}_4$ , and 1.5 M  $\text{Na}_2\text{SO}_4$ , respectively, for 500 times, were tested under the same condition of  $\epsilon\text{-MnO}_2@\text{ACC}$ .

MnO<sub>2</sub>@ACC. The CV curves at 20 mV s<sup>-1</sup> of these electrodes were highly similar, demonstrating that the charge storage process of them includes both the surface capacitive and the diffusion-controlled processes (Supplementary Fig. 1a). The areal capacitances (Supplementary Fig. 1c) are determined from the GCD curves (Supplementary Fig. 1b), while the rate capabilities (Supplementary Fig. 1f) are calculated based on the capacitance retentions upon increasing the discharge current density from 5 to 30 mA cm<sup>-2</sup> (Supplementary Fig. 1c).

Upon increasing electrolyte concentration for *in-situ* inserting Na<sup>+</sup> shutter ions from 0.5 to 1.5 M, the areal capacitances at the current density 5 mA cm<sup>-2</sup> of  $\delta$ -(Na<sup>+</sup><sub>y</sub>Mn<sup>3+</sup><sub>y</sub>Mn<sup>4+</sup><sub>1-y</sub>)O<sub>2</sub>@ACC electrodes are elevated from 3595 to 5875 mF cm<sup>-2</sup>, and the rate capabilities are boosted from 61.20% to 77.8%, respectively. Moreover, the capacitance retentions of  $\delta$ -(Na<sup>+</sup><sub>y</sub>Mn<sup>3+</sup><sub>y</sub>Mn<sup>4+</sup><sub>1-y</sub>)O<sub>2</sub>@ACC after charge/discharge at 30 mA cm<sup>-2</sup> of 10,000 cycles increase from 93% to 97%, much higher than that of  $\epsilon$ -MnO<sub>2</sub>@ACC (51%, Supplementary Fig. 1d). The  $R_s$  values of  $\delta$ -(Na<sup>+</sup><sub>y</sub>Mn<sup>3+</sup><sub>y</sub>Mn<sup>4+</sup><sub>1-y</sub>)O<sub>2</sub>@ACC stepwise decrease from 3.58 to 2.72  $\Omega$ , which are lower than that of  $\epsilon$ -MnO<sub>2</sub>@ACC (4.30  $\Omega$ ) (Supplementary Fig. 1e-f). These results illuminate that the optimal electrolyte concentration for *in-situ* inserting Na<sup>+</sup> shutter ions into  $\epsilon$ -MnO<sub>2</sub>@ACC is 1.5 M Na<sub>2</sub>SO<sub>4</sub>, which can significantly boost areal capacitance, cycle stability and rate capability, accompanied with slightly decreased  $R_s$  value.

### 3.0 PXRD patterns of $\delta\text{-(Na}^{+}_{0.48}\text{Mn}^{3+}_{0.48}\text{Mn}^{4+}_{0.52})\text{O}^{2-}_2\text{@ACC}$

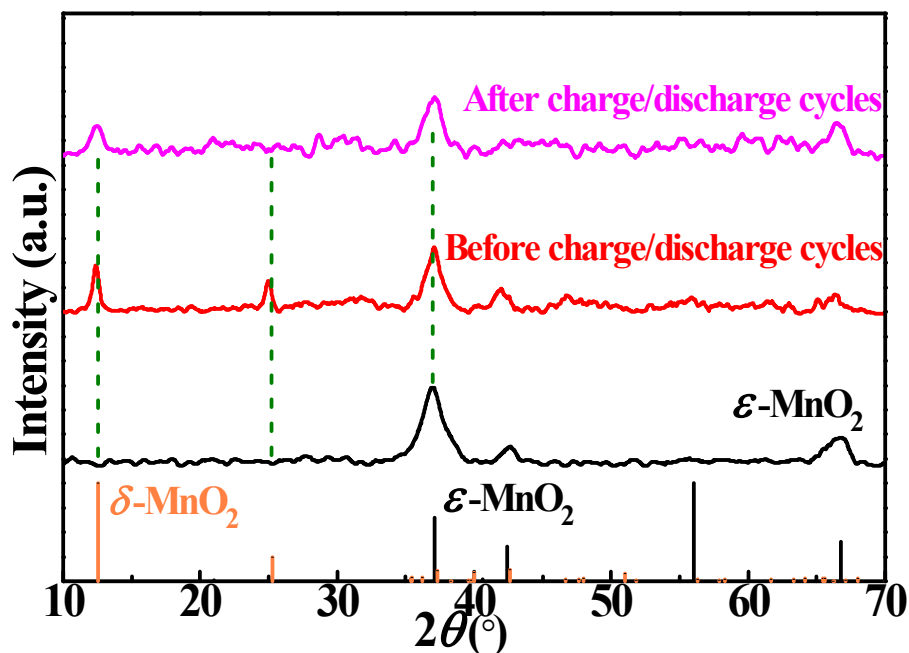

**Supplementary Fig. 2** The measured PXRD patterns of  $\epsilon\text{-MnO}_2\text{@ACC}$  and  $\delta\text{-(Na}^{+}_{0.48}\text{Mn}^{3+}_{0.48}\text{Mn}^{4+}_{0.52})\text{O}^{2-}_2\text{@ACC}$  and electrodes before and after 10,000 charge/discharge cycles at a current density of  $30\text{ mA cm}^{-2}$  and the PXRD patterns of  $\epsilon\text{-MnO}_2$  (PDF # 30-0820) and  $\delta\text{-MnO}_2$  (PDF # 80-1098) obtained from the powder diffraction file (PDF). Note: the interference peaks from the ACC are subtracted in all measured PXRD for clarity.

To investigate the adhesion of  $\text{MnO}_2$  on ACC after long term cycling, take  $\delta\text{-(Na}^{+}_{0.48}\text{Mn}^{3+}_{0.48}\text{Mn}^{4+}_{0.52})\text{O}^{2-}_2\text{@ACC}$  as an example, the PXRD pattern of  $\delta\text{-(Na}^{+}_{0.48}\text{Mn}^{3+}_{0.48}\text{Mn}^{4+}_{0.52})\text{O}^{2-}_2\text{@ACC}$  electrode after 10,000 cycles is indexed to the mixture of  $\epsilon\text{-MnO}_2$  and  $\delta\text{-MnO}_2$ , illuminating that  $\text{MnO}_2$  has high stability and strong adhesion with ACC (Supplementary Fig. 2).

## 4.0 Na 1s XPS spectra of the selected samples

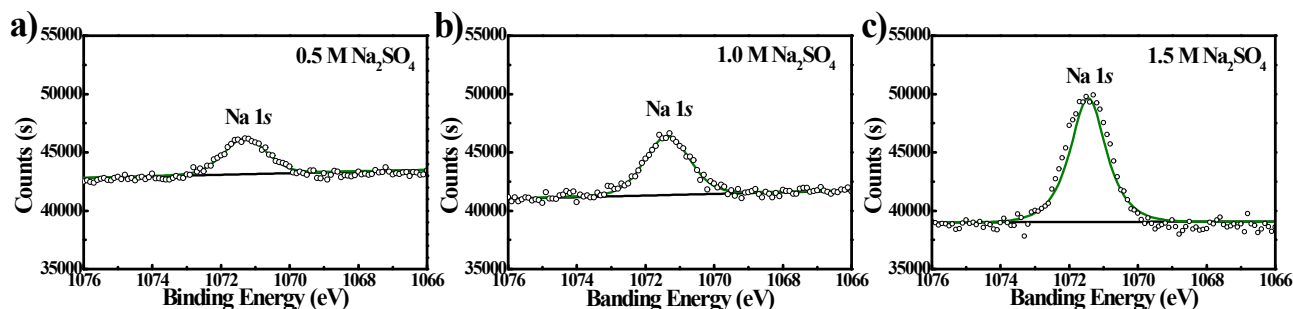

**Supplementary Fig. 3** High resolution XPS spectra of Na 1s region for a series of  $\delta-(\text{Na}^+\text{Mn}^{3+}_y\text{Mn}^{4+}_{1-y})\text{O}^{2-}_2@\text{ACC}$ , in which  $\text{Na}^+$  was inserted by CV sweep at electrolyte concentration of (a) 0.5 M  $\text{Na}_2\text{SO}_4$ , (b) 1.0 M  $\text{Na}_2\text{SO}_4$ , and (c) 1.5 M  $\text{Na}_2\text{SO}_4$ , respectively, for 500 times.

**Tab. 2** The integral area of the Na 1s peak of the  $\delta-(\text{Na}^+\text{Mn}^{3+}_y\text{Mn}^{4+}_{1-y})\text{O}^{2-}_2@\text{ACC}$  electrode synthesized in different concentrations of electrolyte.

| Electrolyte Concentration      | Integral Area |
|--------------------------------|---------------|
| 0.5 M $\text{Na}_2\text{SO}_4$ | 5203          |
| 1.0 M $\text{Na}_2\text{SO}_4$ | 8893          |
| 1.5 M $\text{Na}_2\text{SO}_4$ | 15529         |

To clarify that the areal capacitance of  $\delta-(\text{Na}^+\text{Mn}^{3+}_y\text{Mn}^{4+}_{1-y})\text{O}^{2-}_2@\text{ACC}$  electrode increases with the increase of electrolyte concentration, the Na 1s XPS core spectra of synthesized samples in different electrolyte concentrations have been measured (Supplementary Fig. 3a-c). The integral area of the Na 1s peak gradually increase along with the increase of the electrolyte concentration used for insertion of  $\text{Na}^+$  into  $\varepsilon\text{-MnO}_2@\text{ACC}$  by CV sweep (Tab. 2), indicating that the content of  $\text{Na}^+$  in the  $\delta-(\text{Na}^+\text{Mn}^{3+}_y\text{Mn}^{4+}_{1-y})\text{O}^{2-}_2@\text{ACC}$  electrode gradually increase along with increasing the electrolyte concentration.<sup>2</sup> Consequently, the largest specific capacitance of the  $\delta-(\text{Na}^+\text{Mn}^{3+}_y\text{Mn}^{4+}_{1-y})\text{O}^{2-}_2@\text{ACC}$ , prepared by CV sweep of  $\varepsilon\text{-MnO}_2@\text{ACC}$  for 500 cycles in 1.5 M  $\text{Na}_2\text{SO}_4$ , can be assigned to the highest content of  $\text{Na}^+$  inserted in the  $\delta-(\text{Na}^+\text{Mn}^{3+}_y\text{Mn}^{4+}_{1-y})\text{O}^{2-}_2@\text{ACC}$  electrode.

## 5.0 Electrochemical performance of $\delta-(\text{Li}^+_y\text{Mn}^{3+}_y\text{Mn}^{4+}_{1-y})\text{O}^{2-}_2@\text{ACC}$

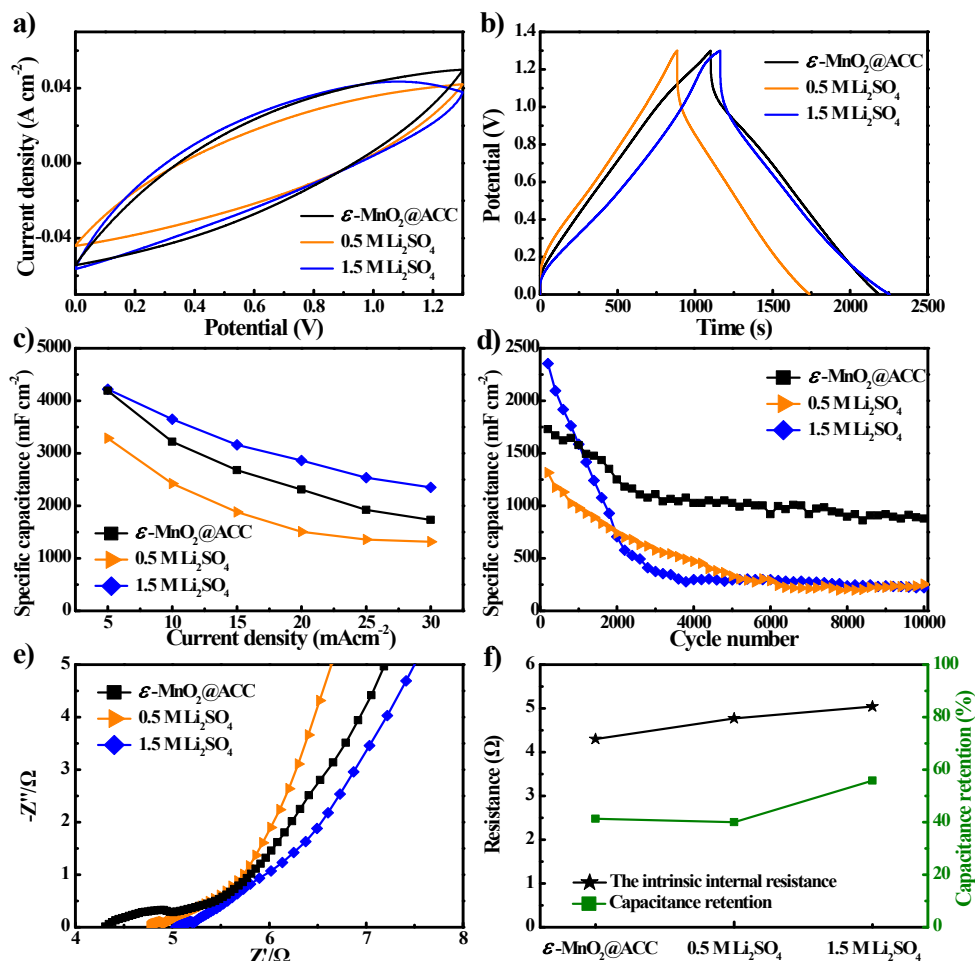

**Supplementary Fig. 4** Electrochemical performances of a series of  $\delta-(\text{Li}^+_y\text{Mn}^{3+}_y\text{Mn}^{4+}_{1-y})\text{O}^{2-}_2@\text{ACC}$ , in which  $\text{Li}^+$  were inserted by CV sweep at  $\text{Li}_2\text{SO}_4$  electrolyte with varied concentration of 0.5 M and 1.5 M, respectively, for 500 times, respectively: (a) CV curves at a scan rate of  $20 \text{ mV s}^{-1}$ , (b) GCD curves at  $5 \text{ mA cm}^{-2}$ , (c) the areal capacitances at various discharge current densities ranging from 5 to  $30 \text{ mA cm}^{-2}$ , (d) the plots of areal capacitance at  $30 \text{ mA cm}^{-2}$  over 10,000 charge/discharge cycles, (e) Nyquist plots, (f) the resistance and the capacitance retention upon increasing the discharge current density from 5 to  $30 \text{ mA cm}^{-2}$ . Note:  $\delta-(\text{Li}^+_y\text{Mn}^{3+}_y\text{Mn}^{4+}_{1-y})\text{O}^{2-}_2@\text{ACC}$  and  $\epsilon\text{-MnO}_2@\text{ACC}$  tested in 1.5 M  $\text{Li}_2\text{SO}_4$  and 1.5 M  $\text{Na}_2\text{SO}_4$ , respectively.

To ascertain the optimal electrolyte concentration for fabricating  $\delta-(\text{Li}^+_y\text{Mn}^{3+}_y\text{Mn}^{4+}_{1-y})\text{O}^{2-}_2$  electrodes by electrochemical method, the electrochemical performances of two  $\delta-(\text{Li}^+_y\text{Mn}^{3+}_y\text{Mn}^{4+}_{1-y})\text{O}^{2-}_2@\text{ACC}$  electrode in which  $\text{Li}^+$  was inserted by CV sweep in 0.5 M  $\text{Li}_2\text{SO}_4$  and 1.5 M  $\text{Li}_2\text{SO}_4$ , respectively, were tested under the same condition of  $\epsilon\text{-MnO}_2@\text{ACC}$ . The CV curves at  $20 \text{ mV s}^{-1}$  of them were highly similar to that of  $\delta-(\text{Na}^+_y\text{Mn}^{3+}_y\text{Mn}^{4+}_{1-y})\text{O}^{2-}_2@\text{ACC}$ , demonstrating that their charge

storage process of these electrodes include the surface capacitive and the diffusion-controlled processes (Supplementary Fig. 4a). The areal capacitances (Supplementary Fig. 4c) are determined from the GCD curves (Supplementary Fig. 4b), while the rate capabilities (Supplementary Fig. 4f) are calculated based on the capacitance retentions upon increasing the discharge current density from 5 to 30 mA cm<sup>-2</sup> (Supplementary Fig. 4c).

Upon increasing electrolyte concentration for *in-situ* inserting Li<sup>+</sup> shutter ions from 0.5 to 1.5 M, the areal capacitances at 5 mA cm<sup>-2</sup> of  $\delta\text{-(Li}_y\text{Mn}^{3+}_y\text{Mn}^{4+}_{1-y})\text{O}^{2-}_2\text{@ACC}$  electrodes are elevated from 3286 to 4220 mF cm<sup>-2</sup>, and the rate capabilities are boosted from 40.02% to 55.78%, respectively. Moreover, the capacitance retentions of  $\delta\text{-(Li}_y\text{Mn}^{3+}_y\text{Mn}^{4+}_{1-y})\text{O}^{2-}_2\text{@ACC}$  after charge/discharge at 30 mA cm<sup>-2</sup> of 10,000 cycles decrease from 19% to 9%, being much lower than that of  $\varepsilon\text{-MnO}_2\text{@ACC}$  (51%, Supplementary Fig. 4d). The  $R_s$  values of  $\delta\text{-(Li}_y\text{Mn}^{3+}_y\text{Mn}^{4+}_{1-y})\text{O}^{2-}_2\text{@ACC}$  stepwise increase from 4.77 to 5.04  $\Omega$ , which are higher than that of  $\varepsilon\text{-MnO}_2\text{@ACC}$  (4.30  $\Omega$ ) (Supplementary Fig. 4e-f). The above comprehensive analysis demonstrates that the optimal electrolyte concentration for *in-situ* inserting Li<sup>+</sup> shutter ions into  $\varepsilon\text{-MnO}_2\text{@ACC}$  is 1.5 M Li<sub>2</sub>SO<sub>4</sub>, which can significantly boost areal capacitance and rate capability, but significantly decrease cycle stability and increase  $R_s$  values. The higher supercapacitive performance of  $\delta\text{-(Na}_y\text{Mn}^{3+}_y\text{Mn}^{4+}_{1-y})\text{O}^{2-}_2\text{@ACC}$  electrode compared to that of  $\delta\text{-(Li}_y\text{Mn}^{3+}_y\text{Mn}^{4+}_{1-y})\text{O}^{2-}_2\text{@ACC}$  primarily attributed to the better matching of Na<sup>+</sup> hydrated diameter (7.1 Å) with the interlayer distance of  $\delta\text{-MnO}_2$  (7.0 Å), and the higher surface areas of  $\delta\text{-(Na}_y\text{Mn}^{3+}_y\text{Mn}^{4+}_{1-y})\text{O}^{2-}_2\text{@ACC}$  during charge/discharge cycling.

## 6.0 PXRD pattern of Fe<sub>2</sub>O<sub>3</sub>@ACC

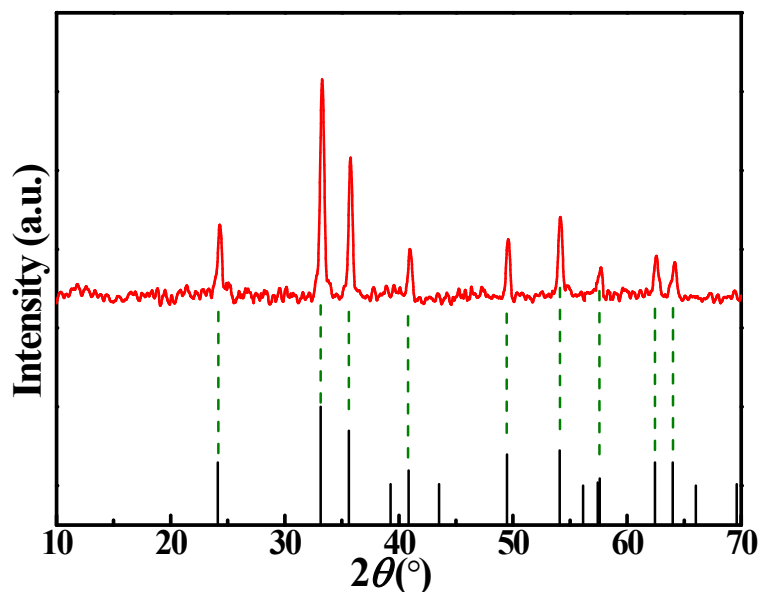

**Supplementary Fig. 5** The measured PXRD pattern of as-synthesized Fe<sub>2</sub>O<sub>3</sub>@ACC and the PXRD pattern of Fe<sub>2</sub>O<sub>3</sub> (PDF # 33-0664) obtained from the powder diffraction file (PDF). Note: the interference peaks from the ACC are subtracted in the measured PXRD for clarity.

Since the negative electrode also plays a critical role in the electrochemical performance of final fabricated asymmetric supercapacitor, Fe<sub>2</sub>O<sub>3</sub> *in situ* grown on ACC (Fe<sub>2</sub>O<sub>3</sub>@ACC) with high areal capacitances is selected as anode. All peaks in the PXRD of Fe<sub>2</sub>O<sub>3</sub>@ACC match well with the rhombohedral Fe<sub>2</sub>O<sub>3</sub> (PDF # 33-0664), indicating that the successful synthesis of rhombohedral Fe<sub>2</sub>O<sub>3</sub> with high purity and crystallinity (**Supplementary Fig. 5**).<sup>3</sup>

## 7.0 Electrochemical performance of Fe<sub>2</sub>O<sub>3</sub>@ACC

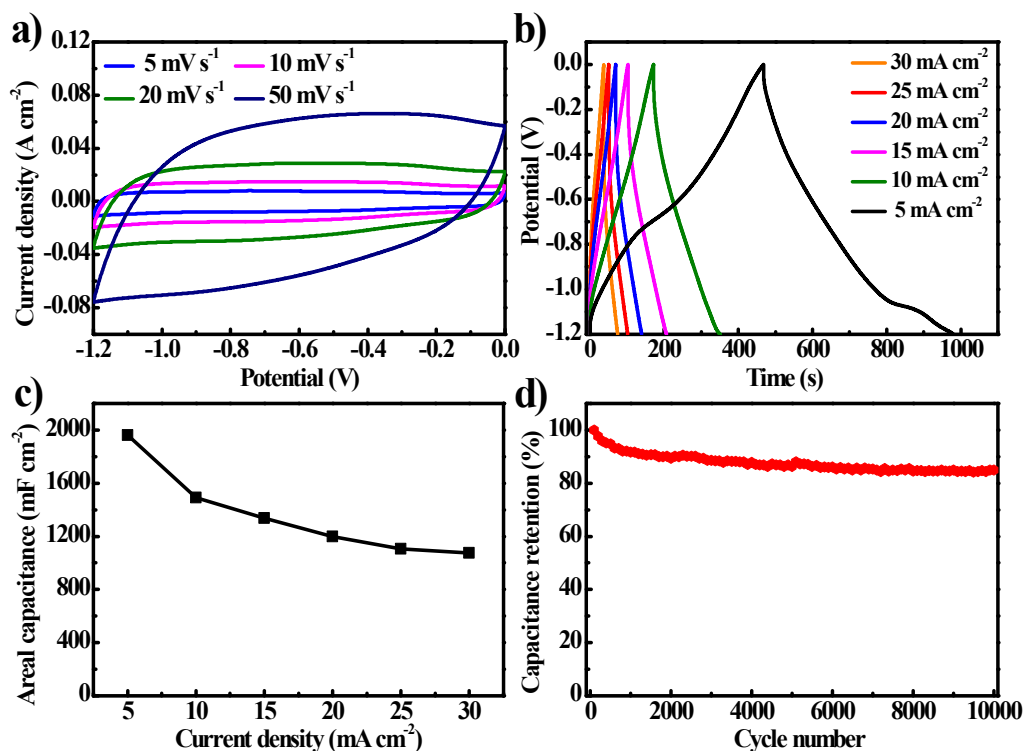

**Supplementary Fig. 6** Electrochemical performance of Fe<sub>2</sub>O<sub>3</sub>@ACC tested in 1.5 M Na<sub>2</sub>SO<sub>4</sub>: (a) CV curves at different scan rates ranging from 5 to 50 mV s<sup>-1</sup>, (b) GCD curves at different discharge current densities ranging from 5 to 30 mA cm<sup>-2</sup>, (c) the areal capacitances at various discharge current densities ranging from 5 to 30 mA cm<sup>-2</sup>, (d) the plots of areal capacitance at 30 mA cm<sup>-2</sup> over 10,000 charge/discharge cycles.

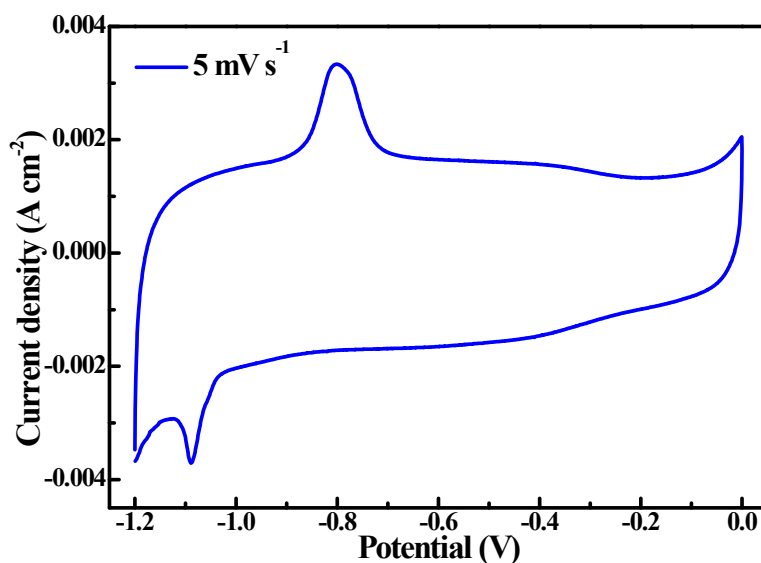

**Supplementary Fig. 7** The enlarged CV curve of Fe<sub>2</sub>O<sub>3</sub>@ACC at a scan rate of 5 mV s<sup>-1</sup>.

To meet the requirements of the energy density on the industrial level, we planned to construct

asymmetric supercapacitors to extend voltage and increase the energy density of the energy storage device, besides the fabrication of  $\delta\text{-(Na}^{+}_{0.48}\text{Mn}^{3+}_{0.48}\text{Mn}^{4+}_{0.52})\text{O}^{2-}_2\text{@ACC}$  positive electrodes with high electrochemical performances. Here, the  $\text{Fe}_2\text{O}_3$  *in-situ* growing on ACC is fabricated as negative electrode, and the recorded CV curves of  $\text{Fe}_2\text{O}_3\text{@ACC}$  (Supplementary Fig. 6a) at different scan rates is approximal rectangular, illuminating that the areal capacitance of  $\text{Fe}_2\text{O}_3\text{@ACC}$  are primarily contributed from electric double layer capacitance (EDLC). Noticeably, the enlarged CV curve of  $\text{Fe}_2\text{O}_3\text{@ACC}$  at a scan rate of  $5 \text{ mV s}^{-1}$  exhibits a clear redox peak, demonstrating that pseudocapacitive behavior is also contributed to the high capacitance of  $\text{Fe}_2\text{O}_3\text{@ACC}$  (Supplementary Fig. 7). The appearance of significant plateaus in GCD curve at  $5 \text{ mA cm}^{-2}$  further demonstrate that the high areal capacitance of  $\text{Fe}_2\text{O}_3\text{@ACC}$  is composed of both EDLC and pseudocapacitance (Supplementary Fig. 6b).<sup>4</sup> The areal capacitance at  $5 \text{ mA cm}^{-2}$  of  $\text{Fe}_2\text{O}_3\text{@ACC}$  is high up to  $1960 \text{ mF cm}^{-2}$  (Supplementary Fig. 6b-c). Furthermore,  $\text{Fe}_2\text{O}_3\text{@ACC}$  possesses a good rate capability of 54.8% upon increasing current densities from 5 to  $30 \text{ mA cm}^{-2}$  and excellent capacitance retention of 85% after 10,000 charge/discharge cycles at  $30 \text{ mA cm}^{-2}$  (Supplementary Fig. 6d). These above results demonstrate that  $\text{Fe}_2\text{O}_3\text{@ACC}$  exhibits excellent electrochemical performance, and can be selected as the negative electrode material for assembling of asymmetric supercapacitors, in which  $\delta\text{-(Na}^{+}_{0.48}\text{Mn}^{3+}_{0.48}\text{Mn}^{4+}_{0.52})\text{O}^{2-}_2\text{@ACC}$  is used as positive electrodes.

## 8.0 Electrochemical performance of $\delta\text{-(M}^+\text{Mn}^{3+}\text{Mn}^{4+}_{1-y})\text{O}^{2-}_2\text{@ACC}$ ( $\text{M}^+= \text{Rb}^+, \text{Cs}^+$ )

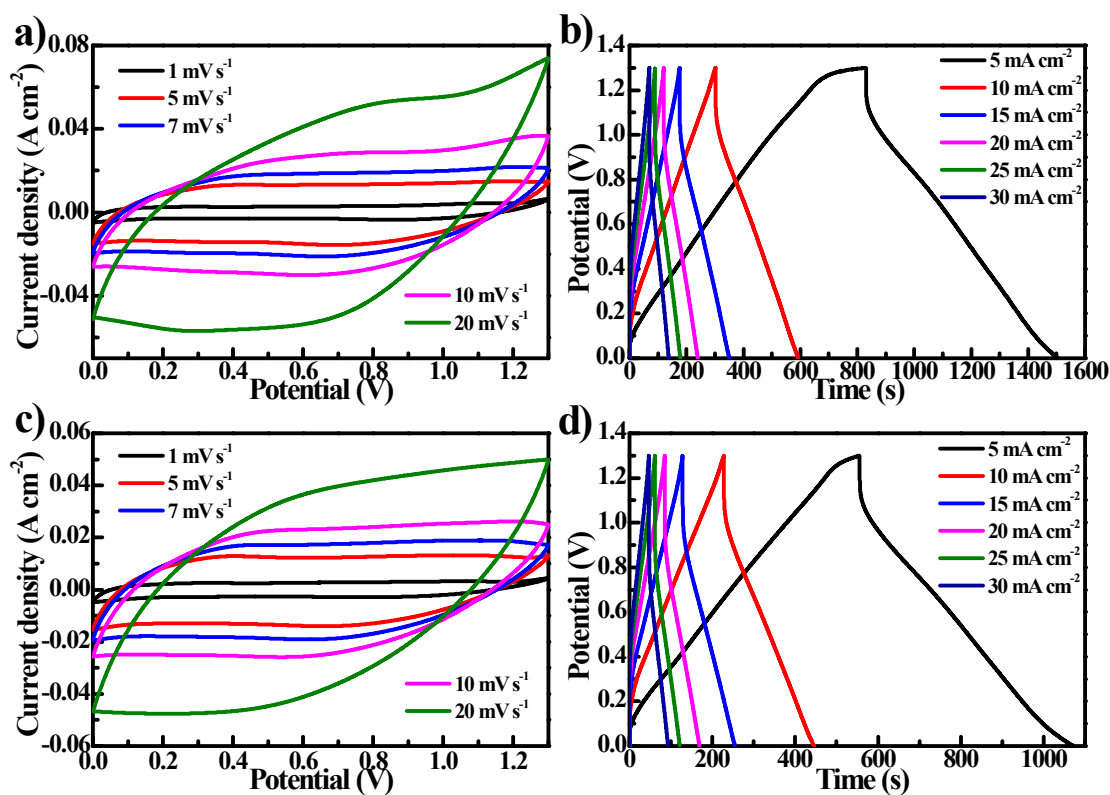

**Supplementary Fig. 8** Electrochemical performances of  $\delta\text{-(M}^+\text{Mn}^{3+}\text{Mn}^{4+}_{1-y})\text{O}^{2-}_2\text{@ACC}$  ( $\text{M}^+= \text{Rb}^+, \text{Cs}^+$ ), in which  $\text{M}^+$  was inserted by CV sweep at 1.5 M  $\text{Rb}_2\text{SO}_4$  and 4.5 M  $\text{Cs}_2\text{SO}_4$  electrolyte, respectively, for 500 times: (a) CV curves at different scan rates ranging from 1 to 20  $\text{mV s}^{-1}$  of  $\delta\text{-(Rb}^+\text{Mn}^{3+}\text{Mn}^{4+}_{1-y})\text{O}^{2-}_2\text{@ACC}$ , (b) GCD curves at different discharge current densities ranging from 5 to 30  $\text{mA cm}^{-2}$  of  $\delta\text{-(Rb}^+\text{Mn}^{3+}\text{Mn}^{4+}_{1-y})\text{O}^{2-}_2\text{@ACC}$ , (c) CV curves at different scan rates ranging from 1 to 20  $\text{mV s}^{-1}$  of  $\delta\text{-(Cs}^+\text{Mn}^{3+}\text{Mn}^{4+}_{1-y})\text{O}^{2-}_2\text{@ACC}$ , (d) GCD curves at different discharge current densities ranging from 5 to 30  $\text{mA cm}^{-2}$  of  $\delta\text{-(Cs}^+\text{Mn}^{3+}\text{Mn}^{4+}_{1-y})\text{O}^{2-}_2\text{@ACC}$ . Note: The electrochemical performances of  $\delta\text{-(Rb}^+\text{Mn}^{3+}\text{Mn}^{4+}_{1-y})\text{O}^{2-}_2\text{@ACC}$  and  $\delta\text{-(Cs}^+\text{Mn}^{3+}\text{Mn}^{4+}_{1-y})\text{O}^{2-}_2\text{@ACC}$  were tested in 1.5 M  $\text{Rb}_2\text{SO}_4$  and 1.5 M  $\text{Cs}_2\text{SO}_4$ , respectively.

In order to further investigate the size effect of inserted shutter alkali metal ions with ionic diameter larger than  $\text{K}^+$  on the electrochemical performances of  $\varepsilon\text{-MnO}_2$  based electrodes, the  $\delta\text{-(M}^+\text{Mn}^{3+}\text{Mn}^{4+}_{1-y})\text{O}^{2-}_2\text{@ACC}$  ( $\text{M}^+= \text{Rb}^+, \text{Cs}^+$ ) electrodes were synthesized by the CV sweep method, being similar to that of the  $\delta\text{-(Na}^{+}_{0.48}\text{Mn}^{3+}_{0.48}\text{Mn}^{4+}_{0.52})\text{O}^{2-}_2\text{@ACC}$  electrode. The disparity between these synthesis methods is only replacing 1.5 M  $\text{Na}_2\text{SO}_4$  with the saturated electrolyte 1.5 M  $\text{Rb}_2\text{SO}_4$  and 4.5 M  $\text{Cs}_2\text{SO}_4$ , respectively. The shape of CV curves at the scan rate ranging from 1 to 20  $\text{mV s}^{-1}$

of  $\delta\text{-(M}^+\text{Mn}^{3+}_y\text{Mn}^{4+}_{1-y})\text{O}^{2-}_2@\text{ACC}$  ( $\text{M}^+=\text{Rb}^+, \text{Cs}^+$ ) were highly similar to that of  $\delta\text{-(Na}^+\text{Mn}^{3+}_y\text{Mn}^{4+}_{1-y})\text{O}^{2-}_2@\text{ACC}$ , demonstrating that the charge storage processes of these two electrodes are similar to that of  $\delta\text{-(Na}^+\text{Mn}^{3+}_y\text{Mn}^{4+}_{1-y})\text{O}^{2-}_2@\text{ACC}$ , including the surface capacitive and the diffusion-controlled processes (Supplementary Fig. 8a, c). The areal capacitance at  $5\text{ mA cm}^{-2}$  of  $\delta\text{-(Rb}^+\text{Mn}^{3+}_y\text{Mn}^{4+}_{1-y})\text{O}^{2-}_2@\text{ACC}$  and  $\delta\text{-(Cs}^+\text{Mn}^{3+}_y\text{Mn}^{4+}_{1-y})\text{O}^{2-}_2@\text{ACC}$ , determined from the GCD curves, are  $2584$  and  $1980\text{ mF cm}^{-2}$ , respectively, being much lower than that of  $\varepsilon\text{-MnO}_2@\text{ACC}$  ( $4192\text{ mF cm}^{-2}$ ) and  $\delta\text{-(Na}^{+0.48}\text{Mn}^{3+}_{0.48}\text{Mn}^{4+}_{0.52})\text{O}^{2-}_2@\text{ACC}$  ( $5875\text{ mF cm}^{-2}$ ). The rate capability of them, calculated from the capacitance retention upon increasing the discharge current density from  $5$  to  $30\text{ mA cm}^{-2}$  (Supplementary Fig. 8b, d) are  $61.6\%$  and  $53.6\%$ , respectively, being much lower than that of  $\delta\text{-(Na}^{+0.48}\text{Mn}^{3+}_{0.48}\text{Mn}^{4+}_{0.52})\text{O}^{2-}_2@\text{ACC}$  ( $77.8\%$ ), but higher than  $\varepsilon\text{-MnO}_2@\text{ACC}$  ( $41.3\%$ ). These results demonstrate that the better matching of  $\text{M}^+$  hydrated diameter with the interlayer distance of  $\delta\text{-MnO}_2$  ( $7.0\text{ \AA}$ ) leads to the higher cycle stability of  $\delta\text{-(M}^+\text{Mn}^{3+}_y\text{Mn}^{4+}_{1-y})\text{O}^{2-}_2@\text{ACC}$  electrode.

## 9.0 Supplementary References

- 1 Y. Fu, Y. J. Gu, Y. B. Chen, H. Q. Liu and H. H. Zhou, *Solid State Ionics*, 2018, **320**, 16-23.
- 2 Q. L. Ye, R. T. Dong, Z. H. Xia, G. R. Chen, H. L. Wang, G. J. Tan, L. Jiang and F. Wang, *Electrochim. Acta*, 2014, **141**, 286-293.
- 3 J. Li, Y. W. Wang, W. N. Xu, Y. Wang, B. Zhang, S. Luo, X. Y. Zhou, C. L. Zhang, X. Gu and C. G. Hu, *Nano Energy*, 2019, **57**, 379-387.
- 4 Y. Jiang and J. Liu, *Energy Environ. Mater.*, 2019, **2**, 30-37.
